# Supplementary material for: Evaluation of the Dual Gamma Generalized Extreme Value distribution for flood events in Poland
Source: Copernicus journal article supplement (doi:10.5194/hess-29-5165-2025), 2025-10-15
Supplement: Supplementary file 1 [file Gruss et al. 2025 Supplementary material.pdf › Gruss et al. 2025 Supplementary material/Gruss et al. 2025 Supplementary material.pdf]

### **S1. Methods for parameter estimation in one- and two-parameter probability distributions.**

One- and two-parameter distributions were designated to serve as a reference point for evaluating overparameterization and overfitting in more complex models. For this task, the exponential (Exp) and two-lognormal (2LN) distributions were selected.

The Exp was used in the research of Balbi and Lallemand (2023), Ekanayake and Cruise (1993), Willems et al. (2009). The PDF function is given in equation (S1):

$$f(x) = \lambda e^{-\lambda x}, \text{ for } x \geq 0 \quad (\text{S1})$$

where:

$\lambda$  is the rate.

The estimation of the parameters and fitting of Exp distribution was done using the following R packages: 'stats'.

The 2LN was used in the research of Kuczera (1982), Willems et al., (2007), Cassalho et al. (2018), The PDF function is given in equation (S2):

$$f(x) = \frac{1}{\sqrt{2\pi\sigma x}} e^{\frac{-(\log(x)-\mu)^2}{2\sigma^2}}, \quad (\text{S2})$$

where:  $\mu$  and  $\sigma$  are the mean and standard deviation of the logarithm, respectively.

The estimation of the parameters and fitting of 2LN distribution was done using the following R packages: 'stats'.

### **S2. The goodness-of-fit assessment for one- and two-parameter distributions.**

The goodness of fit was assessed using MAE or RMSE accuracy measures and CRPS (for details see subsection 3.4) between two distributions: Exp I LN2. Additionally, both distributions (Exp and LN2) were evaluated against three- and four-parameter distributions (P3, LN3, GEV and GGEV) using the same criteria.

### **S3. Random distributions**

Random distributions were generated for the GEV, GGEV, LN2, and Exp distributions. Using the 'MCMCExtreme' R package, we used random generation from the GGEV distribution: `rggev` to create random samples of the GGEV distribution (Do Nascimento and Moura E Silva, 2015). Sample size ( $n$ ) corresponded to the empirical sample size ( $N$ ). We used the parameters ( $\mu, \sigma, \xi, \delta$ ) determined for the theoretical GGEV distribution. Of course, we did this only for the best-fit samples to the GGEV distribution (281 samples). Next, we obtained new data series, which we called random series.

Using the 'evd' package, we generated random samples from the GEV distribution using the function `rgev` (Stephenson, 2024). The sample size ( $n$ ) was based on the empirical sample size

( $N$ ). We applied the parameters  $(\mu, \sigma, \xi)$  that were determined for the theoretical GEV distribution. This process was conducted exclusively for the 172 best-fit samples to the GEV distribution. Subsequently, we created new data series, which we referred to as random series.

Using the 'stats' package (functions `rlnorm` and `rexp`), random distributions were generated based on the parameters of the theoretical LN2 and Exp distributions (R Core Team, 2022).

The `set.seed` (123) was used for generated random samples so that the results could be reproduced.

Table S1. The count of four fitting distributions (3P, LN3, GEV, GGEV) using mean absolute error, root mean square error and continuous ranked probability score, categorized by types of trends

| Goodness of fit distribution | Mann Kendall trend test      | P3  | LN3 | GEV | GGEV | Sum |
|------------------------------|------------------------------|-----|-----|-----|------|-----|
| Mean absolute error          | No trend ( <i>NMT</i> )      | 96  | 61  | 111 | 178  | 446 |
| Mean absolute error          | Negative trend ( <i>NT</i> ) | 32  | 27  | 53  | 88   | 200 |
| Mean absolute error          | Positive trend ( <i>PT</i> ) | 4   | 5   | 8   | 15   | 32  |
|                              | Sum                          | 132 | 93  | 172 | 281  | 678 |

Explanation to the table: P3 – Pearson type III distribution, LN3 – 3-parameters log-normal distribution, GEV - Generalized extreme value distribution, GGEV - the Dual Gamma Generalized Extreme Value Distribution

Table S2. Probability distributions (P3, LN3, GEV, GGEV) for samples classified by catchment area ranges: micro-catchments (0-10 km<sup>2</sup>), meso-catchments (10-100 km<sup>2</sup>), macro-catchments (100-1,000 km<sup>2</sup>), large catchments (1,000-10,000 km<sup>2</sup>), very large catchments (>10,000 km<sup>2</sup>).

| Catchment area                 | P3 | LN3 | GEV | GGEV | Total |
|--------------------------------|----|-----|-----|------|-------|
| Monotonic trend ( <i>NMT</i> ) |    |     |     |      |       |
| <10                            | 0  | 0   | 2   | 0    | 2     |
| 10-100                         | 9  | 8   | 20  | 11   | 48    |
| 100-1,000                      | 46 | 30  | 62  | 120  | 258   |
| 1,000-10,000                   | 31 | 17  | 18  | 39   | 105   |
| >10,000                        | 10 | 6   | 9   | 6    | 32    |
| Negative trend ( <i>NT</i> )   |    |     |     |      |       |
| <10                            | 0  | 0   | 0   | 0    | 0     |
| 10-100                         | 1  | 2   | 3   | 2    | 8     |
| 100-1,000                      | 14 | 14  | 31  | 50   | 109   |
| 1,000-10,000                   | 13 | 7   | 15  | 27   | 62    |
| >10,000                        | 4  | 4   | 3   | 7    | 18    |
| Positive trend ( <i>PT</i> )   |    |     |     |      |       |
| <10                            | 0  | 0   | 0   | 0    | 0     |
| 10-100                         | 1  | 1   | 3   | 6    | 11    |
| 100-1,000                      | 3  | 4   | 4   | 7    | 18    |
| 1,000-10,000                   | 0  | 0   | 1   | 2    | 3     |
| >10,000                        | 0  | 0   | 0   | 0    | 0     |

Explanation to the table: P3 – Pearson type III distribution, LN3 – 3-parameters log-normal distribution, GEV - Generalized extreme value distribution, GGEV - the Dual Gamma Generalized Extreme Value Distribution

Table S3. Basic characteristics of catchment area size ( $A$ ) and peak flow ( $Qp$ ) for descriptive no trend ( $NMT$ ) samples with determined probability distributions

| No. | Distribution of probability | Trend detection | $A$ [km <sup>2</sup> ] |         | $Qp$ [m <sup>3</sup> /s] |       |
|-----|-----------------------------|-----------------|------------------------|---------|--------------------------|-------|
|     |                             |                 | Min                    | Max     | Min                      | Max   |
| 1   | 3P3                         | $NMT$           | 33                     | 193,666 | 1.94                     | 6,950 |
| 2   | LN3                         | $NMT$           | 36                     | 109,775 | 8.64                     | 6,160 |
| 3   | GEV                         | $NMT$           | 3.6                    | 168,239 | 1.64                     | 6,980 |
| 4   | GGEV                        | $NMT$           | 50                     | 68,216  | 2.18                     | 6,000 |

Table S4. Basic characteristics of catchment area size ( $A$ ) and peak flow ( $Qp$ ) for descriptive negative trend ( $NT$ ) samples with determined probability distributions

| No. | Distribution of probability | Trend detection | $A$ [km <sup>2</sup> ] |         | $Qp$ [m <sup>3</sup> /s] |      |
|-----|-----------------------------|-----------------|------------------------|---------|--------------------------|------|
|     |                             |                 | Min                    | Max     | Min                      | Max  |
| 1   | 3P3                         | $NT$            | 58                     | 32 092  | 6.08                     | 972  |
| 2   | LN3                         | $NT$            | 68                     | 30 648  | 6.56                     | 1480 |
| 3   | GEV                         | $NT$            | 49                     | 38 395  | 4.46                     | 2400 |
| 4   | GGEV                        | $NT$            | 83                     | 180 267 | 4.97                     | 6890 |

Table S5. Basic characteristics of catchment area size ( $A$ ) and peak flow ( $Qp$ ) for descriptive positive trend ( $PT$ ) samples with determined probability distributions

| No. | Distribution of probability | Trend detection | $A$ [km <sup>2</sup> ] |       | $Qp$ [m <sup>3</sup> /s] |     |
|-----|-----------------------------|-----------------|------------------------|-------|--------------------------|-----|
|     |                             |                 | Min                    | Max   | Min                      | Max |
| 1   | 3P3                         | $PT$            | 34                     | 583   | 10.7                     | 464 |
| 2   | LN3                         | $PT$            | 96                     | 376   | 29.4                     | 371 |
| 3   | GEV                         | $PT$            | 48                     | 2 470 | 4.55                     | 235 |
| 4   | GGEV                        | $PT$            | 35                     | 1 480 | 8.29                     | 780 |

## References

- Balbi, M. and Lallemand, D. C. B.: The Cost of Imperfect Knowledge: How Epistemic Uncertainties Influence Flood Hazard Assessments, *Water Resources Research*, 59, e2023WR035685, <https://doi.org/10.1029/2023WR035685>, 2023.
- Cassalho, F., Beskow, S., De Mello, C. R., De Moura, M. M., Kerstner, L., and Ávila, L. F.: At-Site Flood Frequency Analysis Coupled with Multiparameter Probability Distributions, *Water Resour Manage*, 32, 285–300, <https://doi.org/10.1007/s11269-017-1810-7>, 2018.
- Do Nascimento, F. F. and Moura E Silva, W. V.: MCMC4Extremes: Posterior Distribution of Extreme Value Models in R, <https://doi.org/10.32614/CRAN.package.MCMC4Extremes>, 2015.
- Ekanayake, S. T. and Cruise, J. F.: Comparisons of Weibull- and exponential-based partial duration stochastic flood models, *Stochastic Hydrol Hydraul*, 7, 283–297, <https://doi.org/10.1007/BF01581616>, 1993.
- Kuczera, G.: Robust flood frequency models, *Water Resources Research*, 18, 315–324, <https://doi.org/10.1029/WR018i002p00315>, 1982.
- R Core Team: R: A Language and Environment for Statistical Computing, 2022.
- Stephenson, A.: evd: Functions for Extreme Value Distributions, <https://doi.org/10.32614/CRAN.package.evd>, 2024.
- Willems, P., Guillou, A., and Beirlant, J.: Bias correction in hydrologic GPD based extreme value analysis by means of a slowly varying function, *Journal of Hydrology*, 338, 221–236, <https://doi.org/10.1016/j.jhydrol.2007.02.035>, 2007.
- Willems, P., Nyeko, P. O., Francis, M., and Gamal, A.: Regional Flood Frequency Analysis for the River Nile Basin, in: *Proceedings of the International Conference of UNESCO Flanders fit, FRIEND/Nile Project, Towards a Better Cooperation*, Sharm El-Sheikh, Egypt, 555–570, 2009.
