# Supplementary material for: Evaluation of the Dual Gamma Generalized Extreme Value distribution for flood events in Poland
Source: Copernicus journal article supplement (doi:10.5194/hess-29-5165-2025), 2025-10-15
Supplement: Supplementary file [file hess-29-5165-2025-supplement-title-page.pdf › hess-29-5165-2025-supplement-title-page.pdf]

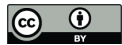

## *Supplement of*

# **Evaluation of the Dual Gamma Generalized Extreme Value distribution for flood events in Poland**

**Łukasz Gruss et al.**

*Correspondence to:* Łukasz Gruss ([lukasz.gruss@upwr.edu.pl](mailto:lukasz.gruss@upwr.edu.pl))

- [hess-29-5165-2025-supplement-title-page.pdf](#)
- Gruss et al. 2025 Supplementary material
  - Gruss et al. 2025 Supplementary material.pdf
  - Q-Q plot GEV theoretical vs empirical.7z
  - Q-Q plot GGEV theoretical vs empirical.7z
  - Q-Q plot LN2 theoretical vs empirical.7z
  - Table S6. GGEV parameters.csv
  - Table S7. GEV parameters.csv
  - Table S8. LN2 parameters.csv
  - Trace plots\_3chains\_cz1.7z
  - Trace plots\_3chains\_cz2.7z
  - Trace\_plots\_Chain1\_without\_Burn-in\_part1.7z
  - Trace\_plots\_Chain1\_without\_Burn-in\_part2.7z
  - gelman\_summary\_3chains\_part1.csv
  - gelman\_summary\_3chains\_part2.csv
  - ks\_test empirical vs theoretical GEV.csv
  - ks\_test empirical vs theoretical Exp.csv
  - ks\_test empirical vs theoretical GGEV.csv
  - ks\_test empirical vs theoretical LN2.csv
  - ks\_test random GEV vs empirical.csv
  - ks\_test random GGEV vs empirical.csv
  - ks\_test random LN2 vs empirical.csv
  - ks\_test\_random Exp vs empirical.csv

The copyright of individual parts of the supplement might differ from the article licence.
